# Supplementary material
Source: bioRxiv or medRxiv preprint supplement (https://www.biorxiv.org/highwire/filestream/73188/field_highwire_adjunct_files/0/091512-1.pdf)

**Figure S1A**

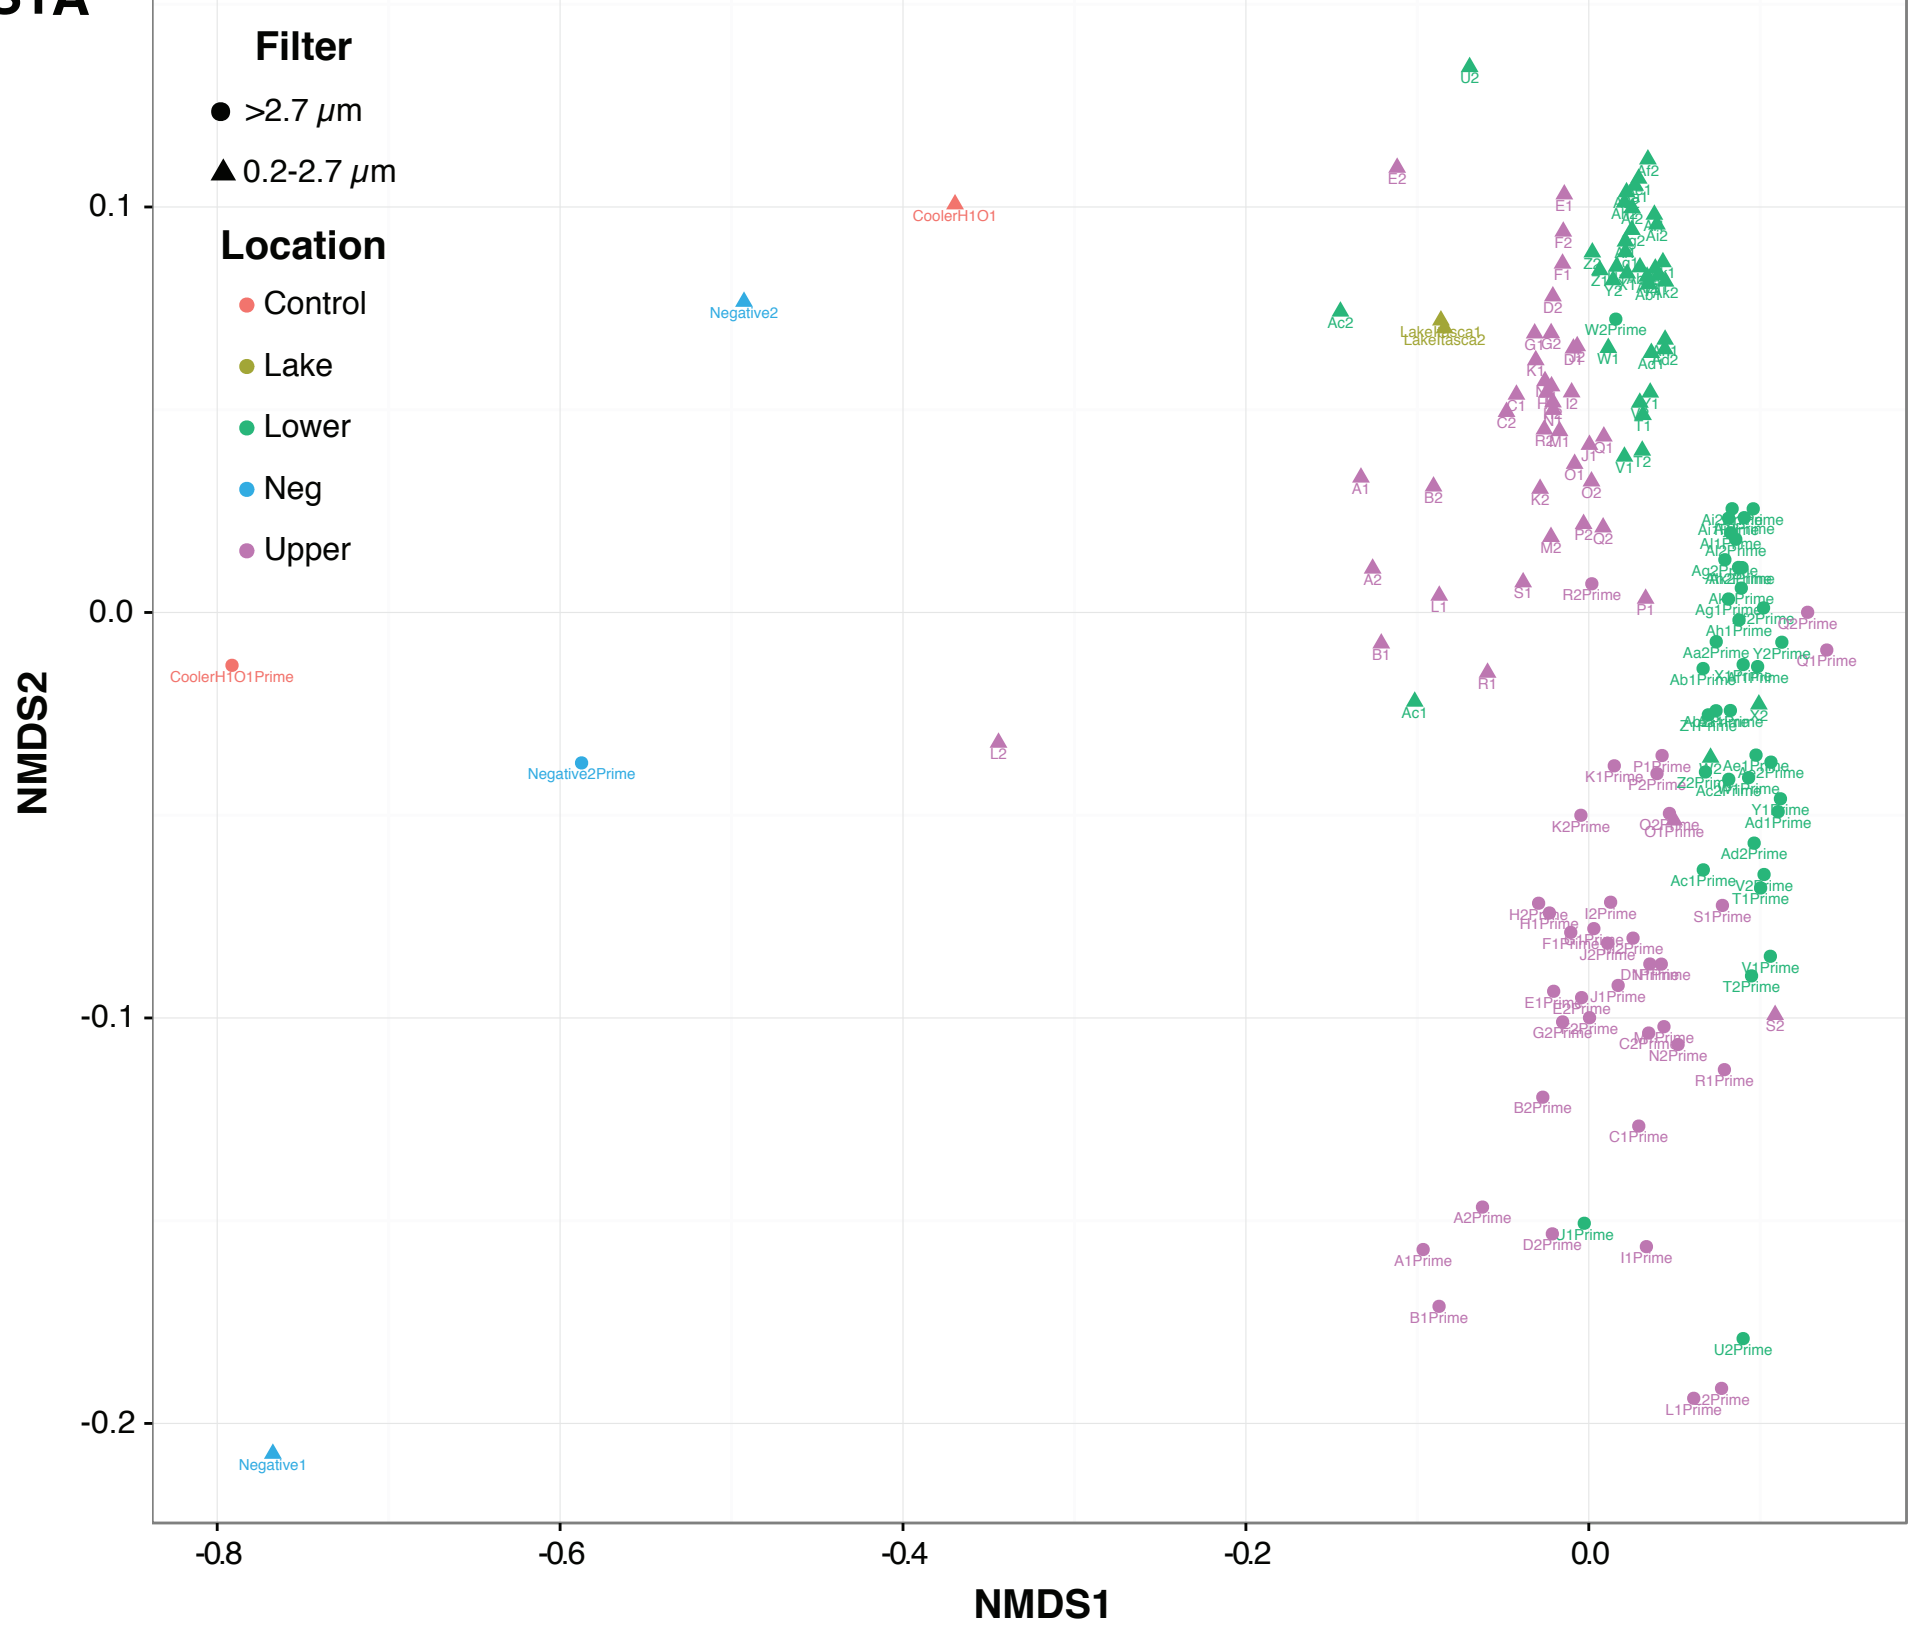

**B**

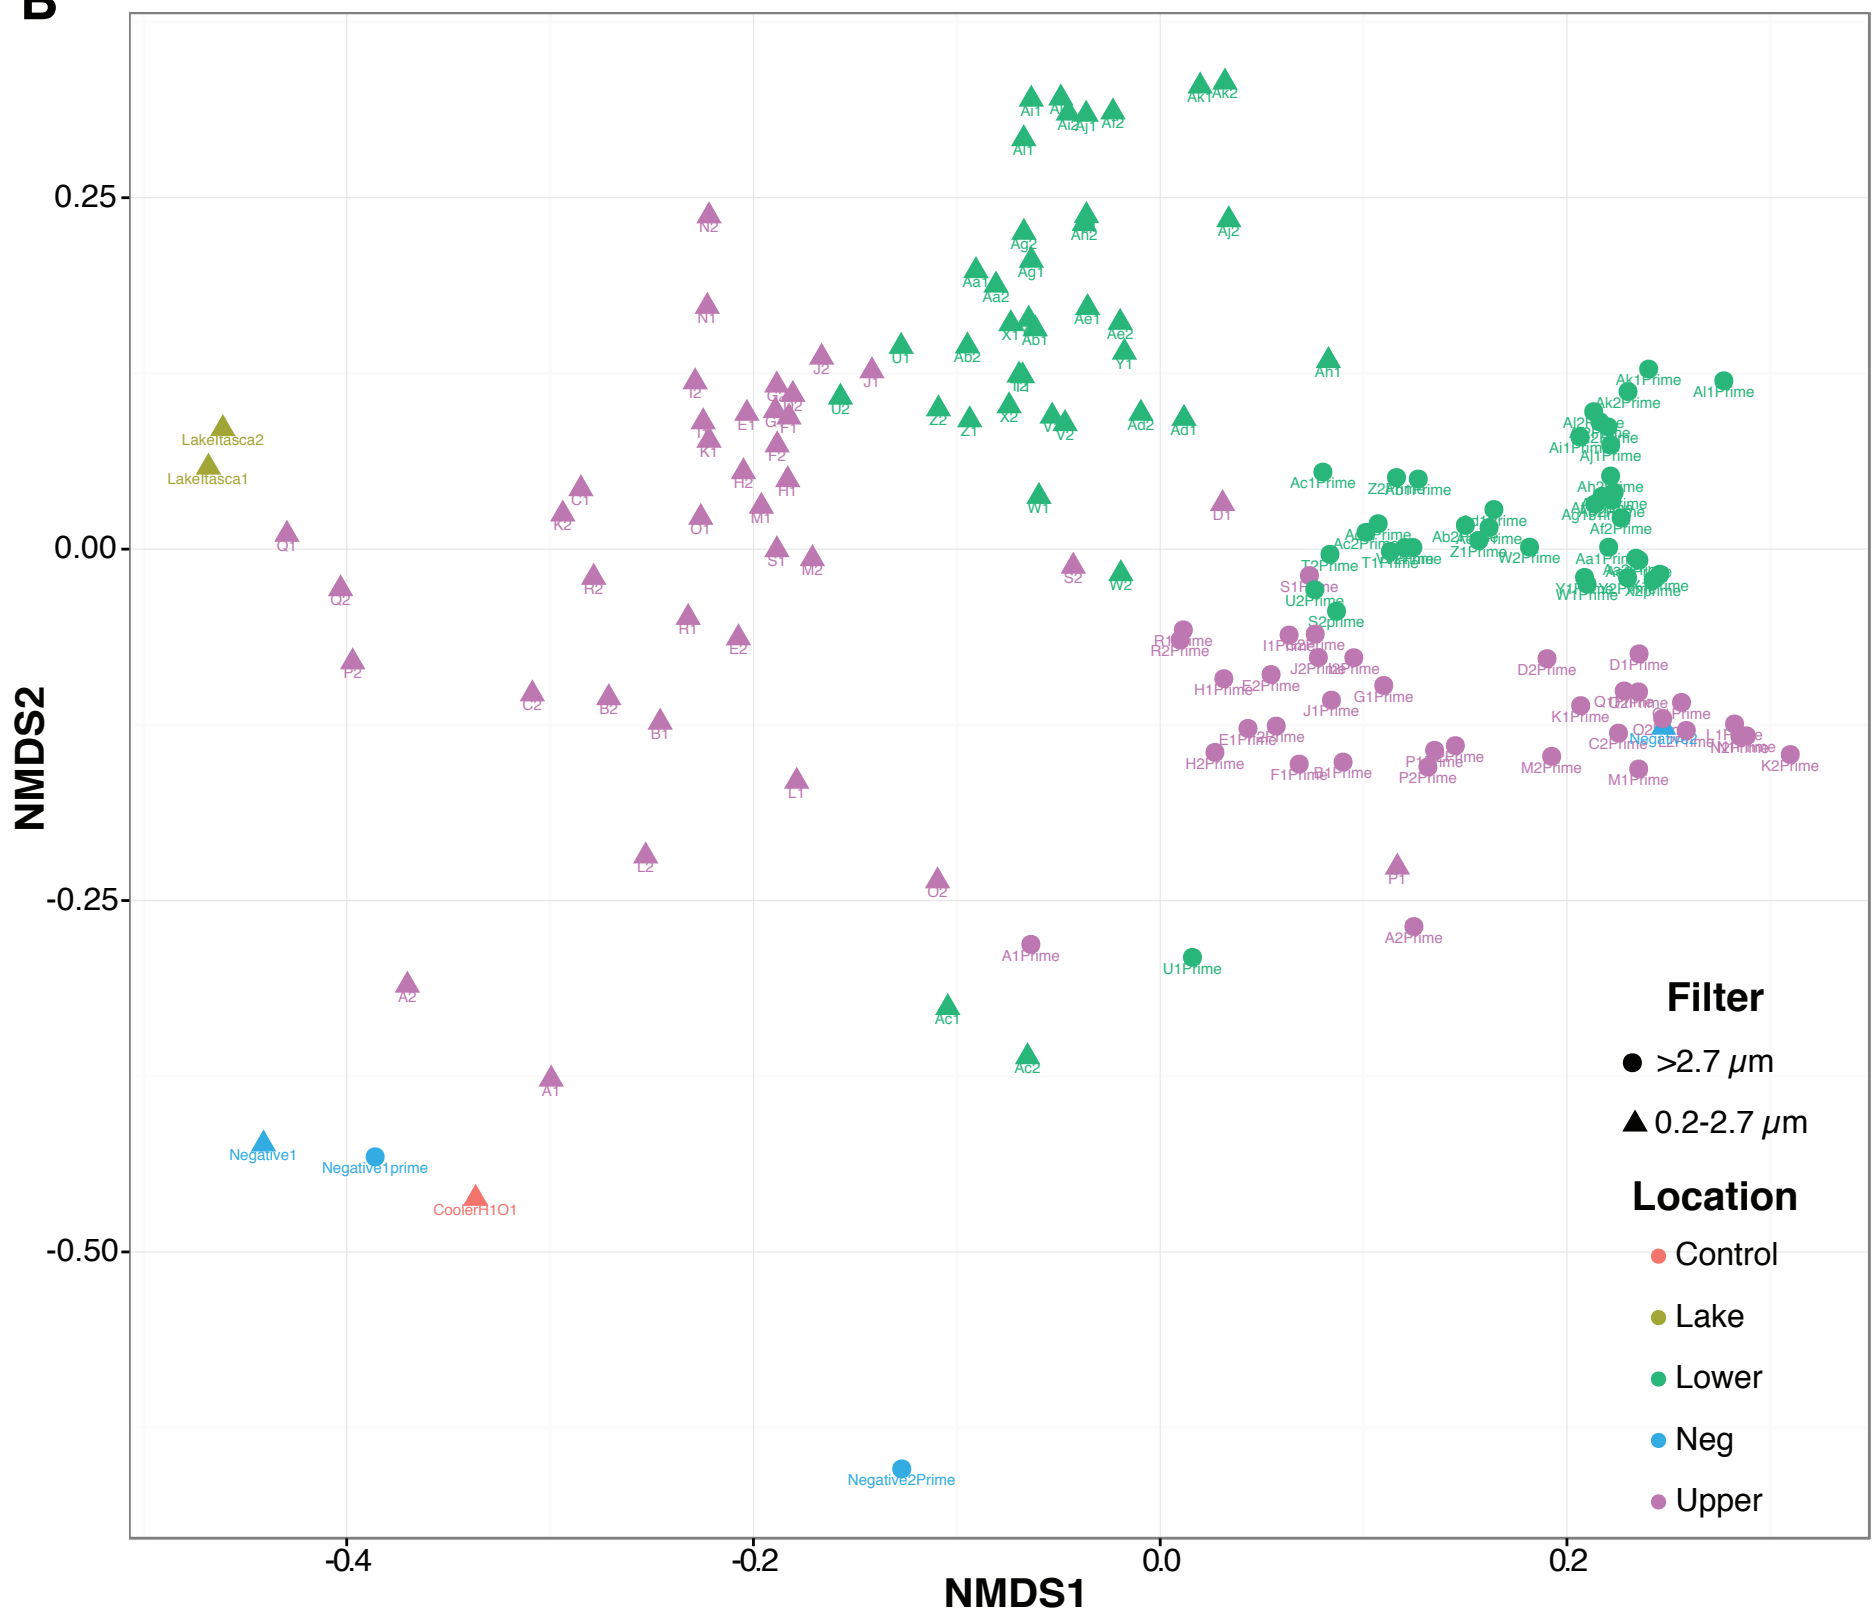

Supplement: Supplementary file [file 091512-1.pdf]
